# Supplementary material for: Chitosan-G-Glycidyl Methacrylate/Au Nanocomposites Promote Accelerated Skin Wound Healing
Source: MDPI journal article supplement (doi:10.3390/pharmaceutics14091855), 2022-09-02
Supplement: s1 [file s1]

**Table S1.** Valuation diagram of wounds: 1= recover, 4 = limited recover. According with score the wound can be classified in four types.

| Score                                    | 1               | 2               | 3            | 4         |
|------------------------------------------|-----------------|-----------------|--------------|-----------|
| Aspect                                   | Erythematous    | Blushed         | Yellow       | Necrotic  |
| Lesion extension                         | 0-1 Cm          | >1-3cm          | >3-6 cm      | >6 cm     |
| Lesion deep                              | 0               | <1 cm           | 1-3 Cm       | >3 cm     |
| Exudate quantity                         | Absent          | Insufficient    | Moderate     | Abundant  |
| Exudate quality                          | Without exudate | Serous          | Muddy        | Purulent  |
| Necrotic tissue                          | Absent          | < 25            | 25-50 %      | >50 %     |
| Granular tissue                          | 100-75%         | < 75-50 %       | < 50-25 %    | < 25 %    |
| Edema                                    | Absent          | +               | ++           | +++       |
| Pain                                     | 0-1             | 2-3             | 4-6          | 7-10      |
| Surrounding skin                         | Healthy         | Flaking         | Erythematous | Macerated |
| <b>Classification of wounds by score</b> |                 |                 |              |           |
| Type 1                                   |                 | 10 to 15 points |              |           |
| Type 2                                   |                 | 16 to 21        |              |           |
| Type 3                                   |                 | 22 to 27        |              |           |
| Type 4                                   |                 | 28 to 40        |              |           |
